# Supplementary material for: Building Infrastructure for Surveillance of Adverse and Positive Childhood Experiences: Integrated, Multimethod Approaches to Generate Data for Prevention Action
Source: PubMed Central journal article supplement — Am J Prev Med. Author manuscript; Available in PMC 2022 Jun 21. (PMC9210215; doi:10.1016/j.amepre.2021.11.017), 2022-06

**Appendix**  
**Building Infrastructure for Surveillance of Adverse and Positive Childhood Experiences:**  
**Integrated, Multi-Method Approaches to Generate Data for Prevention Action**  
**Anderson et al.**

**Appendix Table 1.** Adverse Childhood Experience and Positive Childhood Experience Questions Funded by the Centers For Disease Control and Prevention’s Division of Violence Prevention for Jurisdictions to Add to the 2021 Administration of the State or Local Youth Risk Behavior Survey (YRBS)<sup>a</sup>

| Question number <sup>b</sup>         | Construct                               | Question                                                                                                                                                                                                                                                                                             |
|--------------------------------------|-----------------------------------------|------------------------------------------------------------------------------------------------------------------------------------------------------------------------------------------------------------------------------------------------------------------------------------------------------|
| <b>Adverse Childhood Experiences</b> |                                         |                                                                                                                                                                                                                                                                                                      |
| 1                                    | Lifetime prevalence of emotional abuse  | During your life, how often has a parent or other adult in your home sworn at you, insulted you, or put you down?<br>A. Never<br>B. Rarely<br>C. Sometimes<br>D. Most of the time<br>E. Always                                                                                                       |
| 2                                    | Lifetime prevalence of physical abuse   | During your life, how often has a parent or other adult in your home hit, beat, kicked, or physically hurt you in any way?<br>A. Never<br>B. Rarely<br>C. Sometimes<br>D. Most of the time<br>E. Always                                                                                              |
| 3                                    | Lifetime prevalence of sexual abuse     | Has an adult or person at least 5 years older than you ever made you do sexual things that you did not want to do? (Count such things as kissing, touching, or being made to have sexual intercourse.)<br>A. Yes<br>B. No                                                                            |
| 4                                    | Lifetime prevalence of physical neglect | During your life, how often has there been an adult in your household who tried hard to make sure your basic needs were met, such as looking after your safety and making sure you had clean clothes and enough to eat?<br>A. Never<br>B. Rarely<br>C. Sometimes<br>D. Most of the time<br>E. Always |

**Appendix**  
**Building Infrastructure for Surveillance of Adverse and Positive Childhood Experiences:**  
**Integrated, Multi-Method Approaches to Generate Data for Prevention Action**  
**Anderson et al.**

|    |                                                                 |                                                                                                                                                                                                               |
|----|-----------------------------------------------------------------|---------------------------------------------------------------------------------------------------------------------------------------------------------------------------------------------------------------|
| 5  | Lifetime prevalence of witnessing intimate partner violence     | During your life, how often have your parents or other adults in your home slapped, hit, kicked, punched, or beat each other up?<br>A. Never<br>B. Rarely<br>C. Sometimes<br>D. Most of the time<br>E. Always |
| 6  | Lifetime prevalence of household substance abuse                | Have you ever lived with someone who was having a problem with alcohol or drug use?<br>A. Yes<br>B. No                                                                                                        |
| 7  | Lifetime prevalence of household mental illness                 | Have you ever lived with someone who was depressed, mentally ill, or suicidal?<br>A. Yes<br>B. No                                                                                                             |
| 8  | Lifetime prevalence of incarcerated parent/guardian             | Have you ever been separated from a parent or guardian because they went to jail, prison, or a detention center?<br>A. Yes<br>B. No                                                                           |
| 9  | Lifetime prevalence of perceived racial/ethnic injustice        | During your life, how often have you felt that you were treated badly or unfairly because of your race or ethnicity?<br>A. Never<br>B. Rarely<br>C. Sometimes<br>D. Most of the time<br>E. Always             |
| 10 | Lifetime prevalence of perceived sexual minority discrimination | During your life, how often have you felt that you were treated badly or unfairly because of your sexual orientation?<br>A. Never<br>B. Rarely<br>C. Sometimes<br>D. Most of the time<br>E. Always            |

**Appendix**  
**Building Infrastructure for Surveillance of Adverse and Positive Childhood Experiences:**  
**Integrated, Multi-Method Approaches to Generate Data for Prevention Action**  
**Anderson et al.**

|                                       |                                                                      |                                                                                                                                                                                                                                 |
|---------------------------------------|----------------------------------------------------------------------|---------------------------------------------------------------------------------------------------------------------------------------------------------------------------------------------------------------------------------|
| 11                                    | Lifetime prevalence of witnessing community violence                 | Have you ever seen someone get physically attacked, beaten, stabbed, or shot in your neighborhood?<br>A. Yes<br>B. No                                                                                                           |
| 12                                    | Past 12-month incidence of physical violence                         | During the past 12 months, how many times has a parent or other adult in your home hit, beat, kicked, or physically hurt you in any way?<br>A. 0 times<br>B. 1 time<br>C. 2 or 3 times<br>D. 4 or 5 times<br>E. 6 or more times |
| 13                                    | Past 12-month incidence of emotional violence                        | During the past 12 months, how many times has a parent or other adult in your home sworn at you, insulted you, or put you down?<br>A. 0 times<br>B. 1 time<br>C. 2 or 3 times<br>D. 4 or 5 times<br>E. 6 or more times          |
| <b>Positive Childhood Experiences</b> |                                                                      |                                                                                                                                                                                                                                 |
| 14                                    | Lifetime prevalence of feeling able to talk to adults about feelings | During your life, how often have you felt that you were able to talk to an adult in your family or another caring adult about your feelings?<br>A. Never<br>B. Rarely<br>C. Sometimes<br>D. Most of the time<br>E. Always       |
| 15                                    | Lifetime prevalence of feeling supported by friends                  | During your life, how often have you felt that you were able to talk to a friend about your feelings?<br>A. Never<br>B. Rarely<br>C. Sometimes<br>D. Most of the time<br>E. Always                                              |

**Appendix**  
**Building Infrastructure for Surveillance of Adverse and Positive Childhood Experiences:**  
**Integrated, Multi-Method Approaches to Generate Data for Prevention Action**  
**Anderson et al.**

---

|    |                                                     |                                                                                                                                                               |
|----|-----------------------------------------------------|---------------------------------------------------------------------------------------------------------------------------------------------------------------|
| 16 | Incidence of feeling a sense of belonging at school | Do you agree or disagree that you feel close to people at your school?<br>A. Strongly agree<br>B. Agree<br>C. Not sure<br>D. Disagree<br>E. Strongly disagree |
|----|-----------------------------------------------------|---------------------------------------------------------------------------------------------------------------------------------------------------------------|

---

<sup>a</sup>State and local YRBS administrations monitor health behaviors that contribute markedly to the leading causes of death, disability, and social problems among youth and adults in the U.S. These behaviors are often established during childhood and early adolescence. The state and local YRBS surveys are conducted by departments of health and education and provide data representative of mostly public health school students in each jurisdiction. For more information about the YRBS, please visit:

<https://www.cdc.gov/healthyyouth/data/yrbs/index.htm>.

<sup>b</sup>Questions 1–8 are part of the Tier 1 funding depicted in Appendix Figure 1; questions 1–16 are part of Tier 2 funding depicted in Appendix Figure 1.

**Appendix**  
**Building Infrastructure for Surveillance of Adverse and Positive Childhood Experiences:**  
**Integrated, Multi-Method Approaches to Generate Data for Prevention Action**  
**Anderson et al.**

**Appendix Figure 1.** Comprehensive adverse childhood experiences (ACEs) and positive childhood experiences (PCEs) surveillance infrastructure for action.

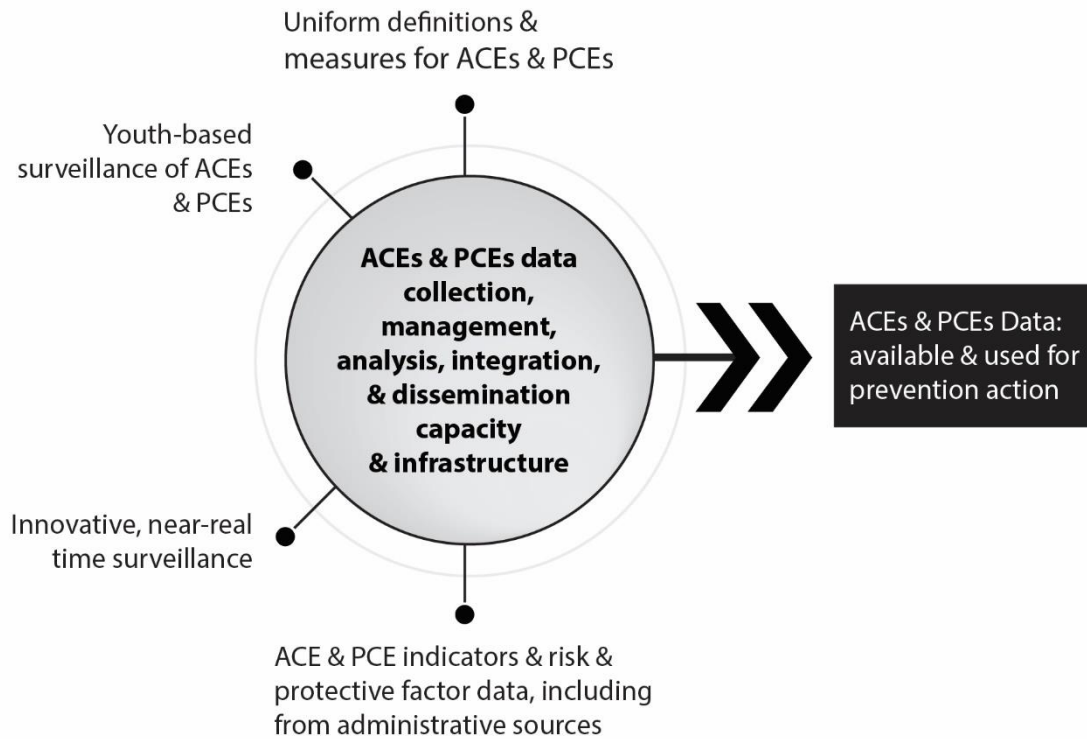

**Appendix**  
**Building Infrastructure for Surveillance of Adverse and Positive Childhood Experiences:**  
**Integrated, Multi-Method Approaches to Generate Data for Prevention Action**  
**Anderson et al.**

**Appendix Figure 2.** U.S. jurisdictions funded by the Centers for Disease Control and Prevention’s Division of Violence Prevention to add either 8 or 16 adverse childhood experience (ACE) or positive childhood experience (PCE) questions to the 2021 administration of their state or local Youth Risk Behavior Survey.

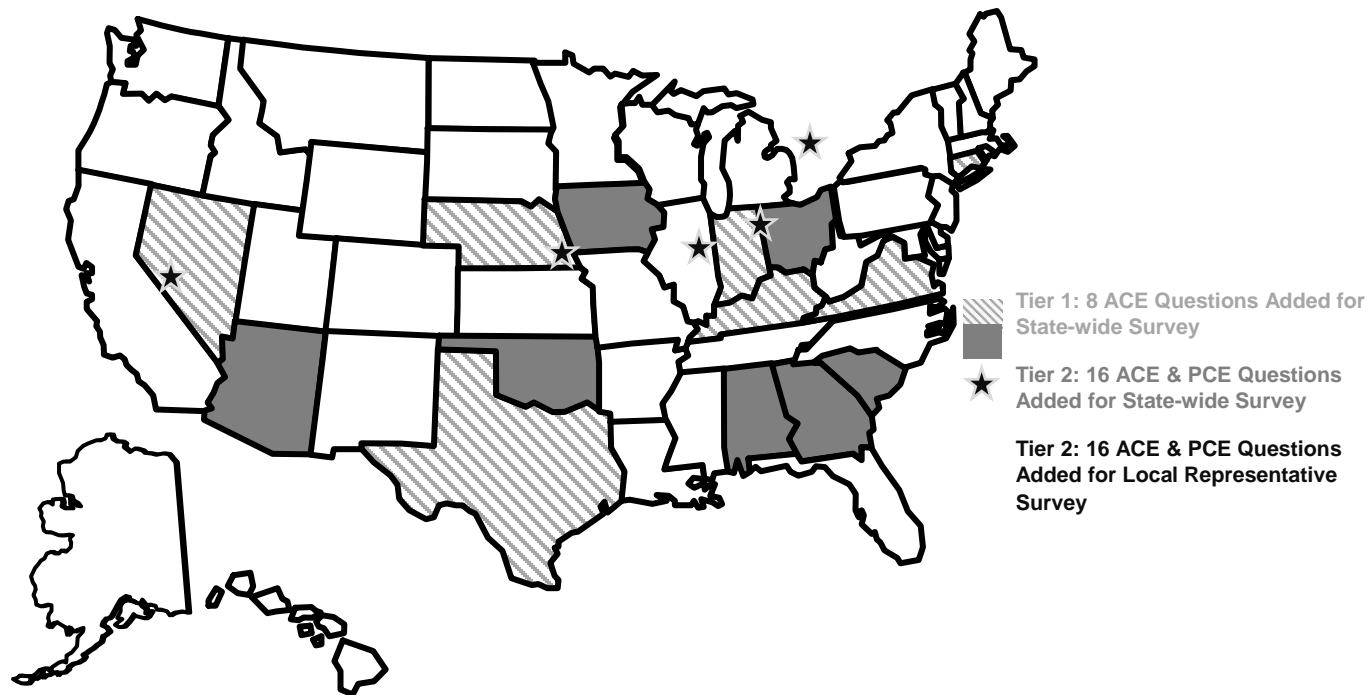

Supplement: NIHMS1814375-supplement-Online_Supplement.pdf [file NIHMS1814375-supplement-Online_Supplement.pdf]
